# Supplementary material
Source: PubMed Central journal article supplement (PMC2662282)
Supplement: M806788200_1.pdf [file M806788200_1.pdf]

## Supplementary Table I

### Primers for Fig1E:

|              |                          |
|--------------|--------------------------|
| pMX-F        | GACGGCATCGCAGCTTGGATACAC |
| pMX-R        | TTATCGTCGACCACTGTGCTG    |
| c-Myc-S1093  | CAGAGGAGGAACGAGCTGAAGCGC |
| Sox2-S768    | GGTTACCTCTTCCTCCCACTCCAG |
| Klf4-S1236   | GCGAACTCACACAGGCGAGAAACC |
| Oct3/4-AS210 | TGCGGGCGGACATGGGGAATCC   |

### Klf4 probe sequence for Fig1F:

1 atggctgtca gcgacgctct gctcccgtcc ttctccactg tegegtccgg cccggcggga  
61 agggagaaga cactgctcc agcaggtgcc ccgactaacc gttggcgtga ggaactctct  
121 cacatgaagc gacttcccc acttcccggc cgcccctacg acctggcggc gacggtggcc  
181 acagacctgg agagtggcgg agctggtgca gttgcagca gtaacaacce ggcctccta  
241 gcccggaggg agaccgagga gttcaacgac ctctggacc tagactttat ctttccaac  
301 tcgctaacce accaggaatc ggtggcggcc accgtgacca cctcggegtc agcttcatcc  
361 tcgtttccc cggcgagcag cggccctgcc agegcgccct ccacctgcag cttcagctat  
421 ccgatccggg cggggggtga cccgggcgtg gctgccagaa acacaggtgg agggctcctc  
481 tacagccgag aatctgcgcc acctcccacg gccccctca acctggggga catcaatgac  
541 gtgagccct cgggcggctt cgtggctgag ctctgcggc cggagtggga cccagtatac  
601 attccgccac agcagcctca gccgccaggt ggggggctga tgggcaagt tgtgctgaag  
661 gegtctctga ccaccctgg cagegagtac agcagccctt cggtcacag ttttagcaaa  
721 ggaagcccag acggcagcca cccctggta gtggcgcct acagcgggtg cccgccgcgc  
781 atgtgcccc agattaagca agaggcgtc cgtctctgca cggtcagccg gtccttagag  
841 gccatttga gcgtggacc ccagctcagc aacggccacc ggcccaaac acacgacttc  
901 ccctggggc ggcagctccc caccaggact accctacac tgagtcccga ggaactgtg  
961 aacagcaggg actgtcacce tggcctgct ctccccag gattcatcc ceatccgggg  
1021 gccactacc ctctttct gccagaccag atgcagtcac aagtccctc tctcattat  
1081 caagagctca tgccaccggg ttctgctg ccagaggagc ccaagccaaa gaggggaaga  
1141 aggtcgtggc cccggaaaag aacagccacc cacacttgat actatgcagg ctgtggcaaa  
1201 acctatacca agagttctca tetcaaggca cacctgcgaa ctacacagg cgagaaacct  
1261 taccactgtg actgggacgg ctgtgggtgg aaattgccc gctccgatga actgaccagg  
1321 cactaccgca aacacacagg gcaccggccc tttagtgcc agaagtgtga caggcccttt  
1381 tccaggtcgg accacctgc cttacacatg aagaggcact tttaa

**Primers for Fig2A:** From Takahashi K, Yamanaka S. Induction of Pluripotent Stem Cells from Mouse Embryonic and Adult Fibroblast Cultures by Defined Factors. *Cell*. 2006;126:663–676.

**Primers for Fig2C:**

|         |                                |
|---------|--------------------------------|
| mOct4U  | GGTTTTTAGAGGATGGGTTGAGTG       |
| mOct4L  | CGGATCCCTAAAACCAAATATCCAACCATA |
| mNanogU | AATGTTTATGGTGGATTTTGTAGGT      |
| mNanogL | CCCACACTCATATCAATATAATAAC      |

**Primers for Fig3B:**

|          |                       |
|----------|-----------------------|
| Gata-6-F | GCAATGCATGCGGTCTAC    |
| Gata-6-R | CTCTTGGTAGCACCAGCTCA  |
| Fgf-5-F  | AAAGTCAATGGCTCCCACGAA |
| Fgf-5-R  | CTTCAGTCTGTACTTCACTGG |
| T-F      | ATGCCAAAGAAAGAAACGAC  |
| T-R      | AGAGGCTGTAGAACATGATT  |
| Is11-F   | AGCAAGAACGACTTCGTGATG |
| Is11-R   | GACTGAGAGGGTCTCCAGCTC |
| Bmp-2-F  | GTTTGTGTTTGGCTTGACGC  |
| Bmp-2-R  | AGACGTCCTCAGCGAATTTG  |
| GAPDH-F  | CATCACCATCTTCCAGGAGC  |
| GAPDH-R  | ATGCCAGTGAGCTTCCCGTC  |
